# Supplementary material for: Covalently immobilized ionic liquids on single layer nanosheets for heterogeneous catalysis applications
Source: Royal Society of Chemistry journal article supplement (doi:10.1039/c7dt01510k), 2017-01-01
Supplement: c7dt01510k1.pdf [file c7dt01510k1.pdf]

## Supporting Information

### Covalently Immobilized Ionic Liquids on Single Layer Nanosheets for Heterogeneous Catalysis Applications

Yingjie Zhou,<sup>1,2</sup> Jingjing Liu,<sup>1</sup> Rongcai Huang,<sup>1</sup> Meng Zhang,<sup>2</sup> Min Xiao,<sup>2</sup>  
Yuezhong Meng,<sup>2,\*</sup> Luyi Sun<sup>1,\*</sup>

*<sup>1</sup>Department of Chemical & Biomolecular Engineering and Polymer Program,  
Institute of Materials Science, University of Connecticut, Storrs, Connecticut 06269,  
United States*

*<sup>2</sup>The Key Laboratory of Low-carbon Chemistry & Energy Conservation of  
Guangdong Province, State Key Laboratory of Optoelectronic Materials and  
Technologies, School of Physics and Engineering, Sun Yat-sen University, Guangzhou  
Guangdong 510275, China*

*<sup>3</sup>Department of Materials Physics, School of Physics and Optoelectronic Engineering,  
Nanjing University of Information Science & Technology, 219 Ningliu Road, Nanjing,  
Jiangsu 210044, China*

\*Authors to whom correspondence should be addressed:

Dr. Luyi Sun, Tel: (860) 486-6895; Fax: (860) 486-4745; Email: [luyi.sun@uconn.edu](mailto:luyi.sun@uconn.edu)

Dr. Yuezhong Meng, Tel: (0086) 20-8411-4113; Fax: (0086) 20-8411-4113; Email:  
[mengyzh@mail.sysu.edu.cn](mailto:mengyzh@mail.sysu.edu.cn)

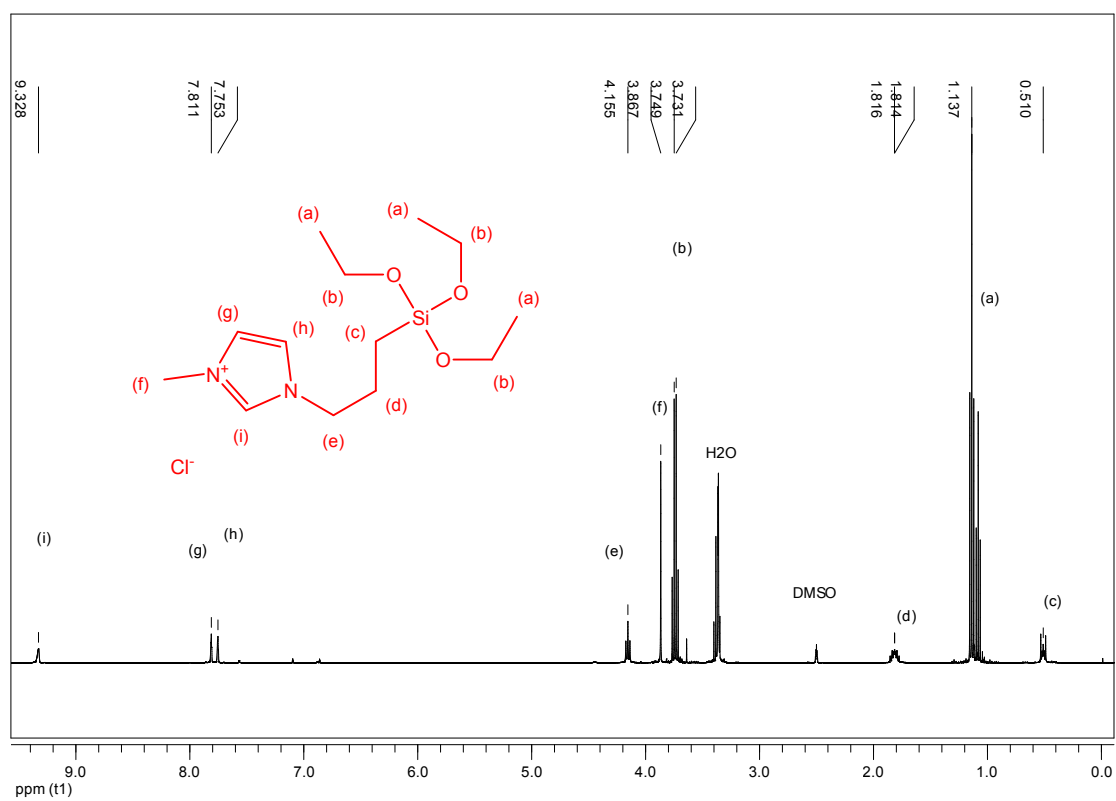

Figure 1S. <sup>1</sup>H NMR of SiIL.

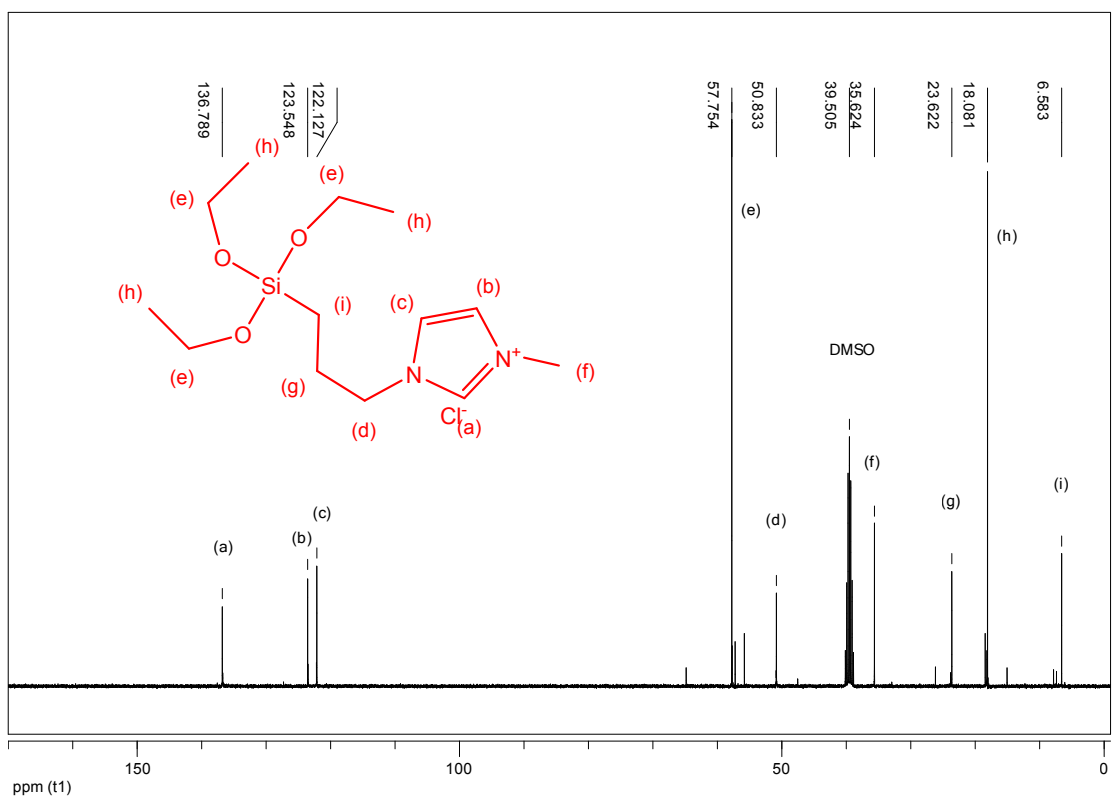

Figure 2S. <sup>13</sup>C NMR of SiIL.

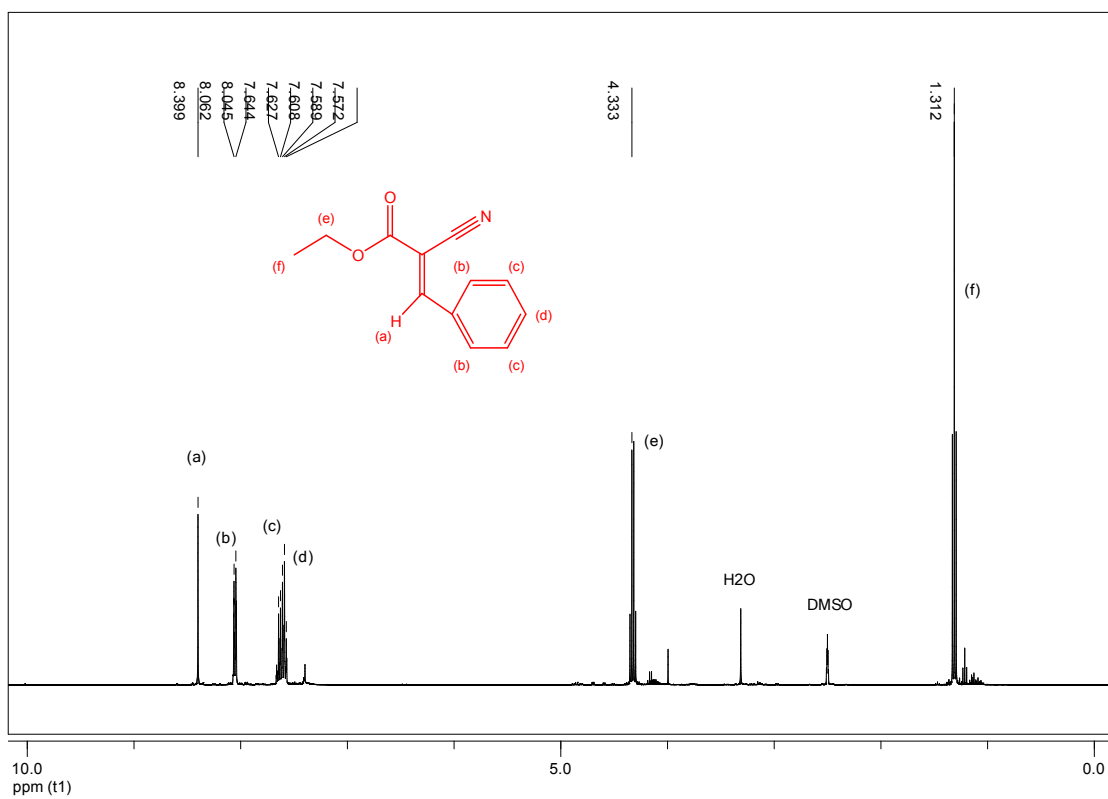

Figure 3S. <sup>1</sup>H NMR of 2-propenoic acid-2-cyano-3-phenyl ethyl ester.
